# Supplementary material for: The PRKD1 promoter is a target of the KRas-NF-κB pathway in pancreatic cancer
Source: PubMed Central journal article supplement (PMC5030668; doi:10.1038/srep33758), 2016-09-21
Supplement: srep33758-s1.pdf [file srep33758-s1.pdf]

Supplementary Information  
for

## **The *PRKD1* promoter is a target of the KRas-NF- $\kappa$ B pathway in pancreatic cancer**

Heike Döppler<sup>1</sup>, Richard Panayiotou<sup>1</sup>, Elizabeth M. Reid<sup>1</sup>, Willibroad Maimo<sup>1</sup>, Ligia Bastea<sup>1</sup> and Peter Storz<sup>1,\*</sup>

<sup>1</sup> Department of Cancer Biology, Mayo Clinic Comprehensive Cancer Center, Mayo Clinic, Jacksonville, FL 32224, USA

\* Corresponding author: Peter Storz, Mayo Clinic, Griffin Building, Room 306, 4500 San Pablo Road, Jacksonville, FL 32224. Tel: 904 953-6909, Fax: 904 953-0277, e-mail: [storz.peter@mayo.edu](mailto:storz.peter@mayo.edu)

Figure S1, related to Figure 3

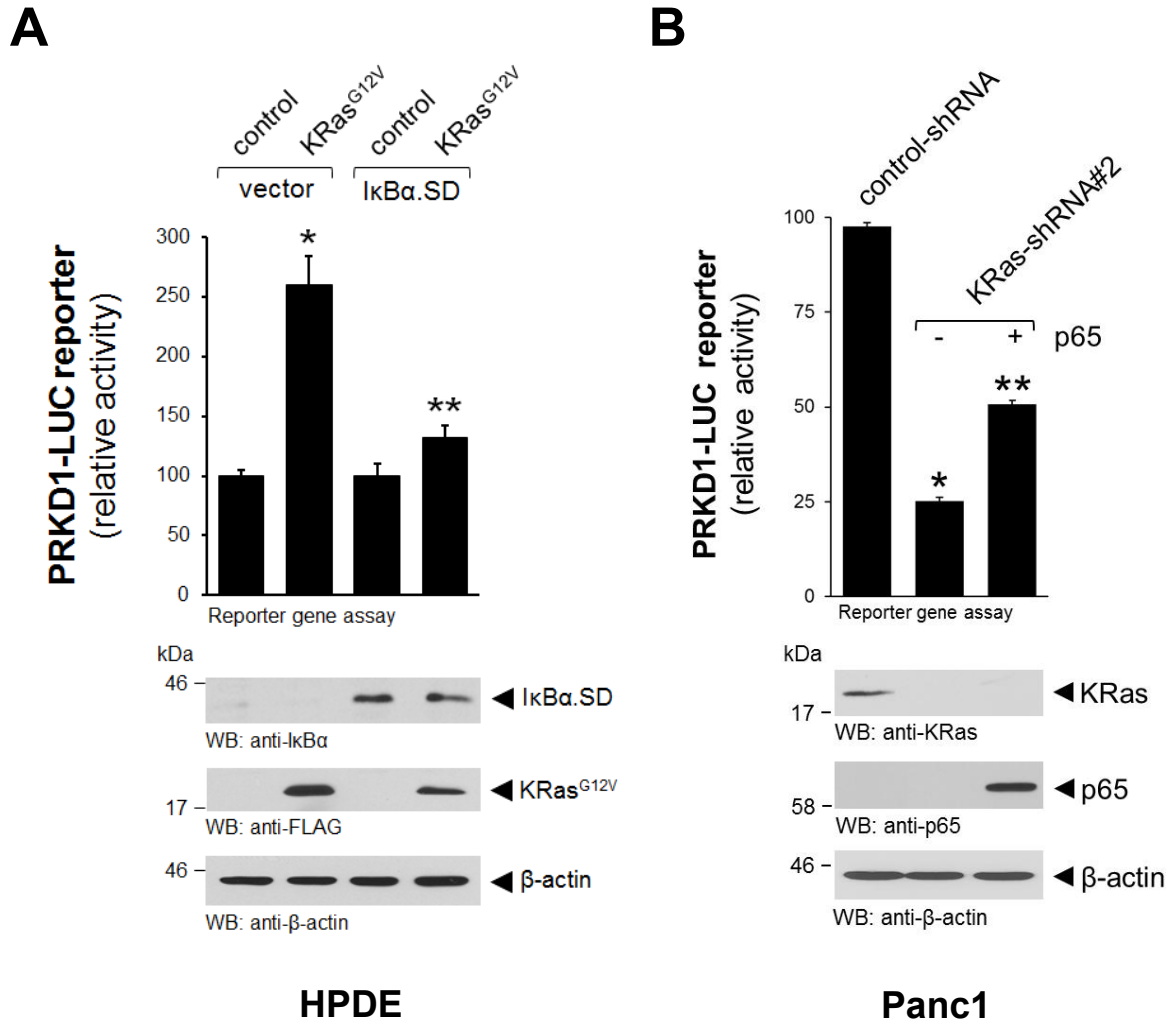

Figure S1, relates to Figure 3: **Oncogenic Kras induces *PRKD1* expression via the canonical NF- $\kappa$ B pathway.** **A:** HPDE cells were co-transfected with vector control, I $\kappa$ B $\alpha$ .SD or KRas<sup>G12V</sup> and *PRKD1*-luciferase and renilla-luciferase reporters. 24 hours after transfection cells were lysed, and reporter gene assays performed. Probing lysates for I $\kappa$ B $\alpha$  (anti-I $\kappa$ B $\alpha$ ), KRas<sup>G12V</sup> (anti-FLAG) or  $\beta$ -actin (anti- $\beta$ -actin) served as expression or loading controls. **B:** Panc1 cells were transfected with control-shRNA or shRNA targeting KRas, as well as vector control or p65 and *PRKD1*-luciferase and renilla-luciferase reporters, as indicated. 48 hours after transfection cells were lysed, and reporter gene assays performed. Probing lysates for KRas (anti-KRas), p65 (anti-p65) or  $\beta$ -actin (anti- $\beta$ -actin) served as expression or loading controls.

Figure S2, related to Figure 4

**A**

Input controls:

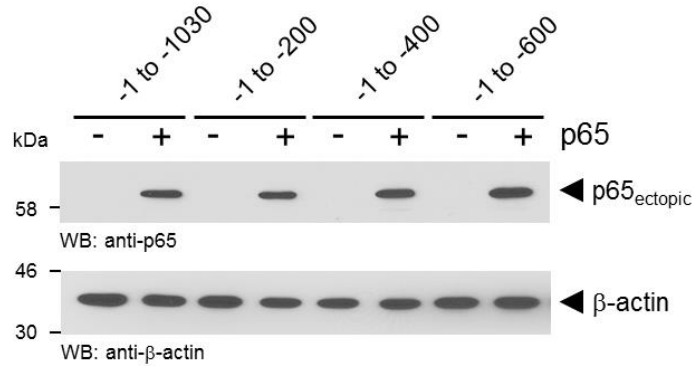

**B**

CGGCGACTTACCTTCTGGTCGACAATGGAGCAAGCCATCTCGCGGACGTGCGCCAGGCTGTAGT  
 CCCC GGACGAGTCCTGCAGCAGCAGCACC GGCTCACGGCTCAGGCCGATCTGCAGATGGAACGA  
 GATGCCCCCGACCGGGGCCGACAGGAGCCAAGAACGGCGCGGGCCCGGGCCCGGACCCCTGGG  
 ACCAGTGC GGCGGCCCTGCGGCAGCTGCCGCCACGGGCAGCAGCGACTGGGCGGCCGCA  
 GGACCGGAGGGGCGCTCATCGCTCGGCGGGGCGCAGGGCCGGGCAGCGGAGGGCGGGGGCTGGC  
 GCGCGGCAGCAGGAAAGTTTTGCAGCCGCTGAGCCAGGAGCTTCTTTCTCCGAGAGCCAGAC  
 GGAAAATAAAAACTTTCCGGAAGTCCCTGGGCTGGGGGAGGGCAAGGGGATGAGGATCGGGA  
 GGGGAGGGGACTAAGGGGAGGAGATGGGGAGGAGGGAAAATGGCCGAGGCGGGAGGACTCTGAG  
 GCCCGGAACCGCGCAGCCGGCTCGGGGCCCGCGCACTGGGGAGGGCGCCGCCGCCCAAGAAT  
 CTGCCGCTGGCGCGCTCGGAAGGACGGGGCGACGGGTGCGCGCGGCCCGAGCGCCGGCGGGG  
 GCGGGGCGGGAAAGGGGCGTGAGGGGCGGGGAAGGGGAGCTGGGGCGGGCACTGGGGAGCCA  
 CCACCCGGCGGGCGGGAGTCGCAGGAGCAGCGGCCGCACTGGCCGAGGGTGCCCGGTGCGC  
 GCCCCCTCCGCCCGCAGTTCCCGGGGCTGAGCCTCCGCGAGCCGGGATAGGACCGAGTGCCGG  
 GGCTCGGAGCCGCTCGGCAGGCGCGGCCCTTCCCTCCCTGCAGGGATTCCCGTCTCTCGGGT  
 CCCGCTGCCCGCCCCGACTGCGGACGGAGTGGATGGGGTGACCGCCTCAGACCCGCTTCCCTG  
 GGGTCGCGAACTTCCCGGGCCCCAAGGTCCCTGCCACCTCTTCCAAATGCTGGAGGACTACGCA  
 CTTCTAC

Figure S2, relates to Figure 4: **Mapping of the NF- $\kappa$ B site in the *PRKD1* promoter region -1 to -1030.** **A:** Control blots (input control) for Fig. 4A. Cell lysates were analyzed by Western blot for overexpression of p65 (anti-p65), as well as for  $\beta$ -actin (anti- $\beta$ -actin; loading control). **B:** Nucleotide sequence of the *PRKD1* promoter (-1 to -1030) fused to a luciferase reporter. Blue labeling indicates the fragment identified in Fig. 4A as relevant for p65-mediated activation of the *PRKD1* promoter. The potential reverse oriented NF- $\kappa$ B binding site within this fragment is indicated in red.
